# Supplementary material for: Association between Handwashing Behavior and Infectious Diseases among Low-Income Community Children in Urban New Delhi, India: A Cross-Sectional Study
Source: MDPI journal article supplement (doi:10.3390/ijerph182312535), 2021-11-28
Supplement: s1 [file s1]

Supplementary Figure:

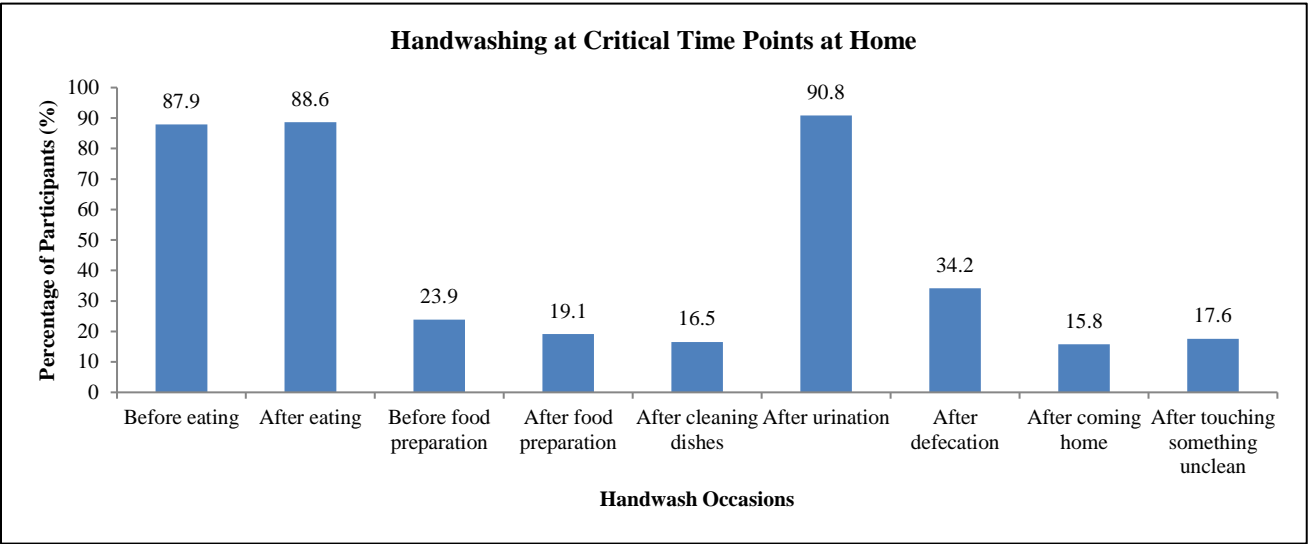

Figure S1. Prevalence of self-reported handwashing at different time points at home
